# Supplementary material
Source: PubMed Central journal article supplement (PMC470763)

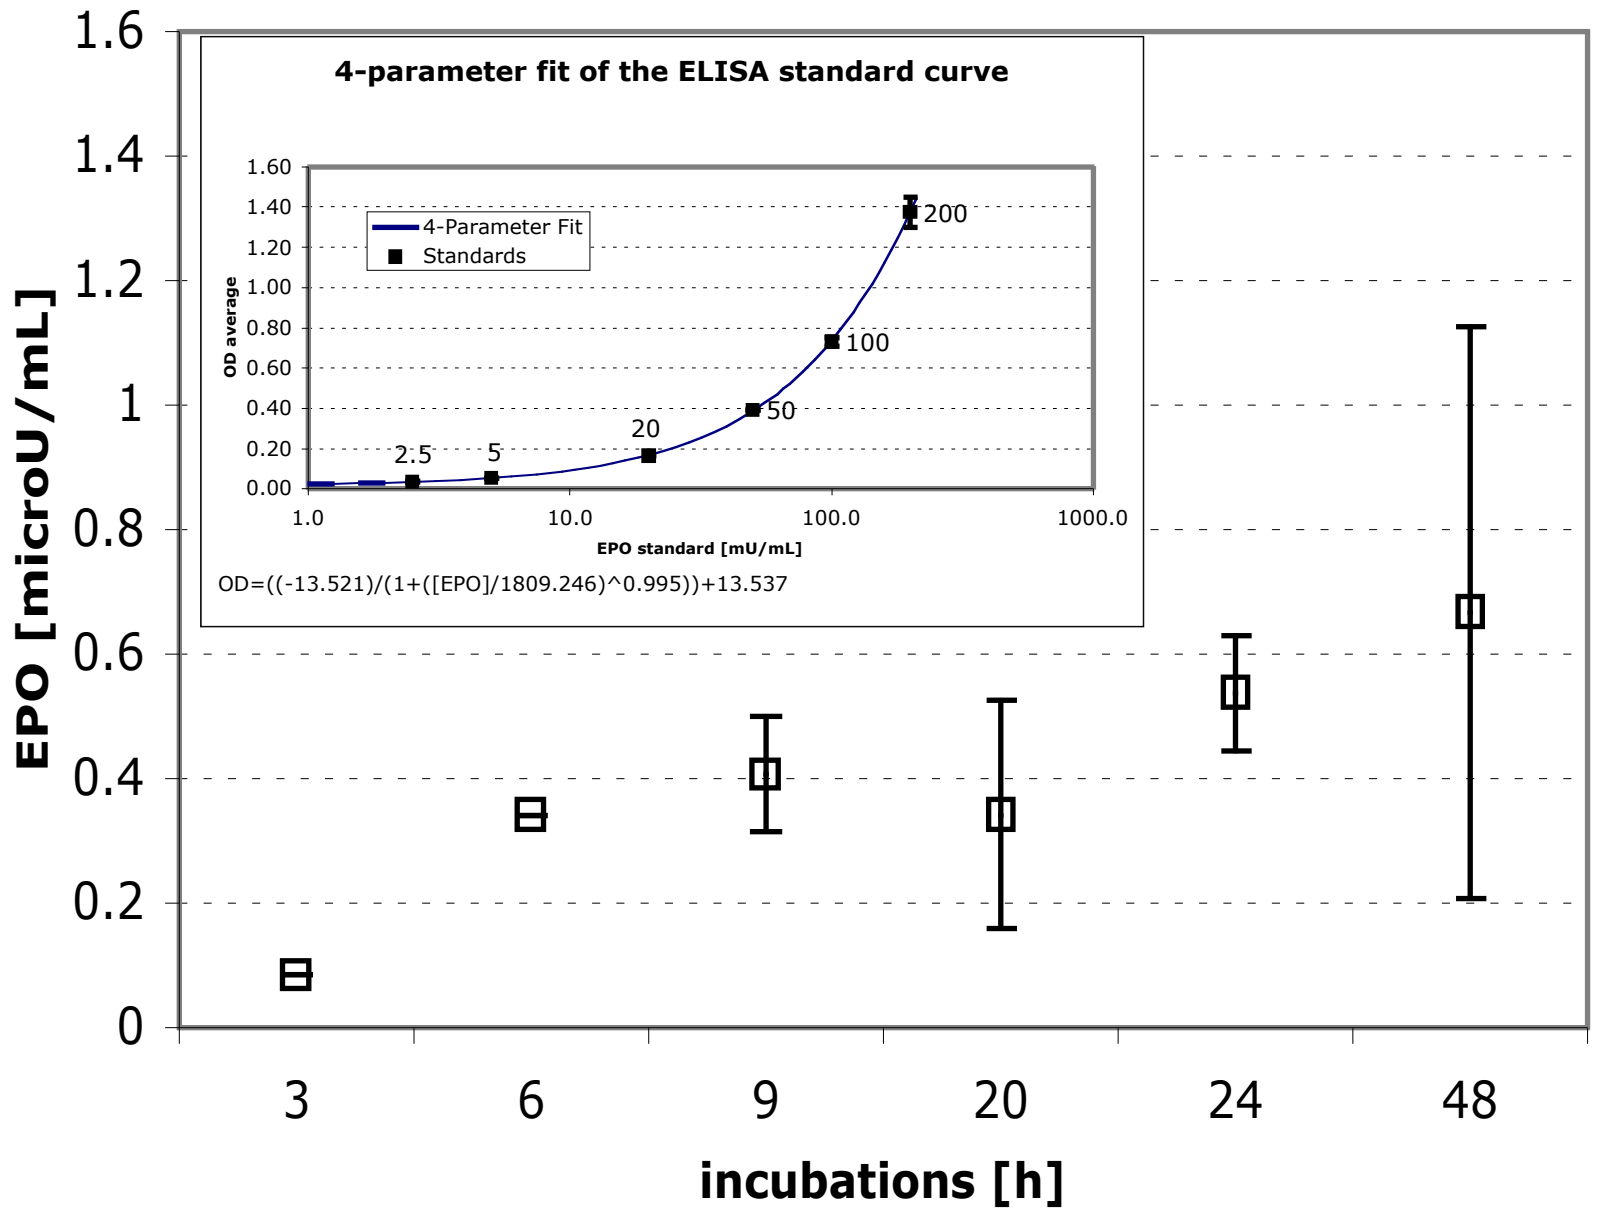

Supplement: pnas_101_26_9855__1.pdf [file pnas_101_26_9855__1.pdf]
